# Supplementary material for: A transparent composite electrode composed of AgCr and Mo-doped GaZnO to realize flexible bottom-emitting OLEDs
Source: Royal Society of Chemistry journal article supplement (doi:10.1039/d3tc00205e), 2023-01-01
Supplement: d3tc00205e1.pdf [file d3tc00205e1.pdf]

## Supporting Information

### **Title: A Transparent Composite Electrode Composed of AgCr and Mo-Doped GaZnO to Realize Flexible Bottom-Emitting OLEDs**

Meng-Hsuan Chiu, Dun-Cheng Huang, Cheng-Yung Ho, I-Hsuan Chaung, Yi-Ching Chen, Tzu-Hsin Hsiao, Chih-Hao Chang\*

*Department of Electrical Engineering, Yuan Ze University, Chungli 32003, Taiwan.*

To whom to correspond:

E-mail: [chc@saturn.yzu.edu.tw](mailto:chc@saturn.yzu.edu.tw) (C.-H. Chang); Tel: 886-3-4638800-7517

### **Contents**

1. AFM images of AgCr (5 nm) on the glass substrate S2
2. Electrical, optical properties, and figure of merit (FOM) of AgCr (7 nm)/MGZO (40 nm) on the glass substrates S2
3. The sheet resistance of AgCr/MGZO composite electrodes with different numbers of bending cycles S3
3. Simulated contribution of each optical mode versus the thickness of MGZO S3
4. EL characteristics of device B with different numbers of bending cycles S4
5. Comparison of transmittance of metal alloy/TCO films reported in the literature S5

**Glass/AgCr (5 nm)**

Ra= 5.02 nm

Rq= 6.26 nm

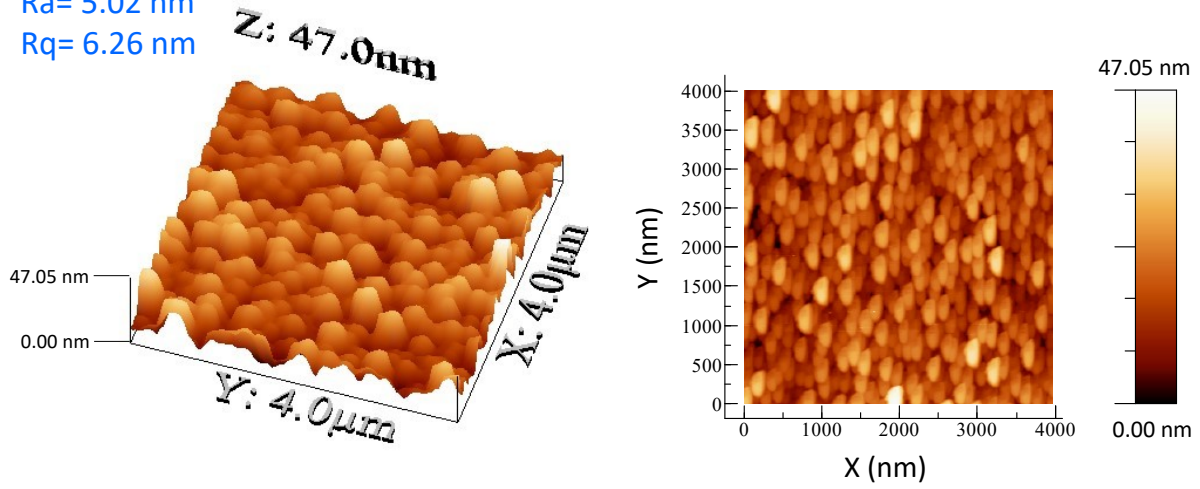

**Figure S1.** AFM images of AgCr (5 nm) on the glass substrate.

**Table S1.** Electrical, optical properties, and figure of merit (FOM) of AgCr (7 nm)/MGZO (40 nm) on the glass substrates.

| Annealing Temp. (°C) | Rs (ohm sq <sup>-1</sup> ) | Tavg. (%) (380-780 nm) | FOM (x10 <sup>-3</sup> ohm <sup>-1</sup> ) |
|----------------------|----------------------------|------------------------|--------------------------------------------|
| –                    | 9.1                        | 88.2                   | 31.3                                       |
| 150                  | 7.8                        | 89.6                   | 42.8                                       |
| 250                  | 7.3                        | 90.2                   | 48.8                                       |
| 350                  | 7.2                        | 89.1                   | 43.8                                       |
| 450                  | 6.9                        | 89.1                   | 45.7                                       |

**Table S2.** The sheet resistance of AgCr/MGZO composite electrodes with different numbers of bending cycles.

| Structure                        | $R_s$ (ohm sq <sup>-1</sup> ) |      |      |      |      |      |      |      |      |       |
|----------------------------------|-------------------------------|------|------|------|------|------|------|------|------|-------|
|                                  | Bending Cycles                | 0    | 100  | 500  | 1000 | 2000 | 4000 | 6000 | 8000 | 10000 |
| PET/AgCr (7 nm)/<br>MGZO (30 nm) |                               | 16.9 | 16.8 | 16.9 | 17.2 | 17.3 | 17.5 | 17.8 | 17.9 | 18.1  |
| PET/AgCr (7 nm)/<br>MGZO (40 nm) |                               | 11.6 | 11.5 | 11.5 | 11.6 | 11.6 | 11.7 | 11.8 | 11.9 | 12.0  |
| PET/AgCr (7 nm)/<br>MGZO (50 nm) |                               | 15.1 | 14.9 | 15.0 | 15.2 | 15.4 | 15.6 | 15.7 | 15.7 | 15.8  |

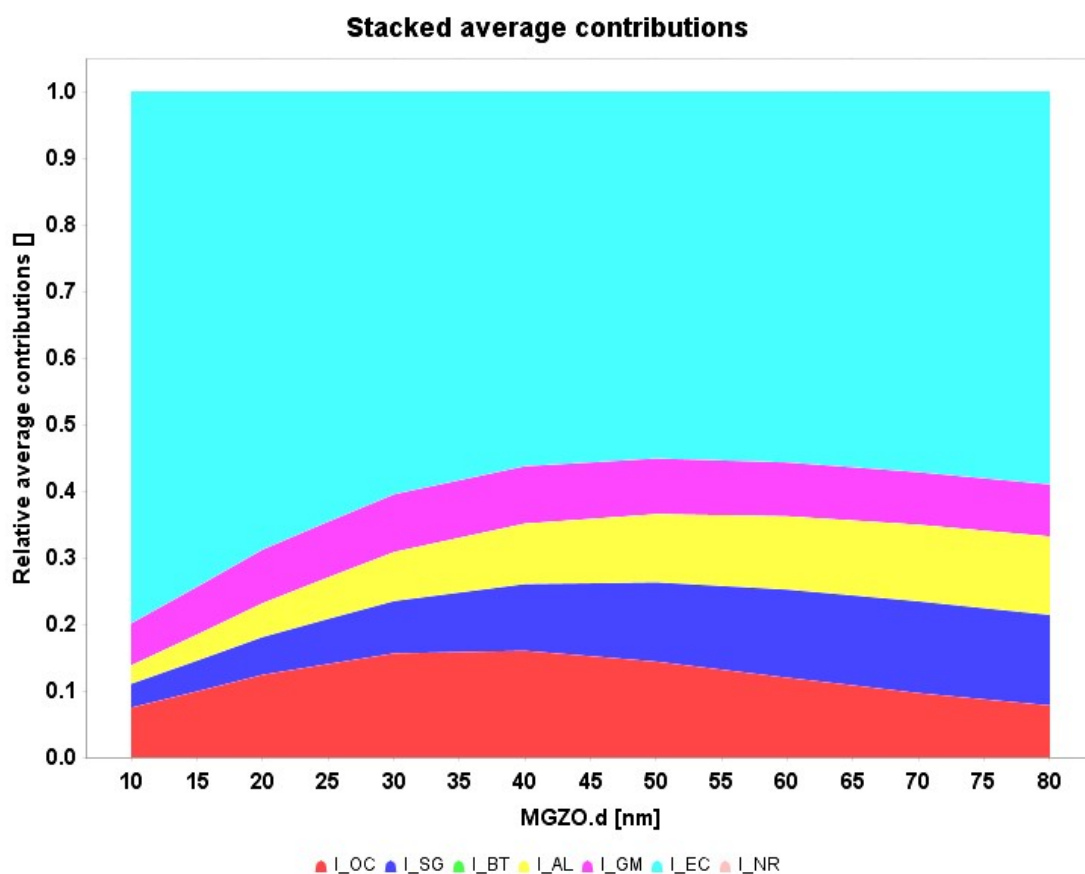

**Figure S2.** Simulated contribution of each optical mode versus the thickness of MGZO of the composite electrode (glass/AgCr (7 nm)/MGZO) in the green OLEDs.

**Table S3.** EL characteristics of device B with different numbers of bending cycles.

| Bending Cycles                              |     | 0            | 100          | 1000         | 5000         | 10000        |
|---------------------------------------------|-----|--------------|--------------|--------------|--------------|--------------|
| External Quantum Efficiency (%)             | [a] | 18.9         | 18.6         | 19.9         | 18.5         | 18.5         |
|                                             | [b] | 18.5         | 18.0         | 19.0         | 18.5         | 18.3         |
| Luminance Efficiency (cd A <sup>-1</sup> )  | [a] | 67.1         | 65.5         | 68.9         | 64.1         | 64.3         |
|                                             | [b] | 65.7         | 63.2         | 65.9         | 63.8         | 63.5         |
| Power Efficiency (lm W <sup>-1</sup> )      | [a] | 87.9         | 84.9         | 89.1         | 74.8         | 75.9         |
|                                             | [b] | 69.3         | 68.9         | 71.9         | 69.3         | 69.2         |
| Turn-on Voltage (V)                         | [c] | 2.4          | 2.3          | 2.3          | 2.3          | 2.3          |
| CIE 1931 Coordinates (x, y)                 | [b] | (0.33, 0.61) | (0.34, 0.60) | (0.33, 0.60) | (0.34, 0.60) | (0.34, 0.60) |
|                                             | [d] | (0.32, 0.61) | (0.34, 0.60) | (0.33, 0.60) | (0.34, 0.60) | (0.34, 0.60) |
| Maximum Luminance (cd m <sup>-2</sup> ) [V] |     | 83850 [9.4]  | 77091 [8.6]  | 75898 [8.8]  | 71411 [9.0]  | 78037 [9.6]  |

[a] Maximum efficiency. [b] Recorded at 10<sup>2</sup> cd m<sup>-2</sup>. [c] Turn-on voltage measured at 1 cd m<sup>-2</sup>.

[d] Recorded at 10<sup>3</sup> cd m<sup>-2</sup>.

**Table S4.** Comparison of transmittance of metal alloy/TCO films reported in the literature.

| Year | Substrate | Metal or metal alloy + TCO                            | Transmittance (%)                      | Ref.      |
|------|-----------|-------------------------------------------------------|----------------------------------------|-----------|
| 2008 | Glass     | Ag (deposition time: 30 s)/ ZnO (50 nm)               | 82% @ 550 nm                           | 1         |
| 2010 | PET       | ZrCu (6 nm)/ITO (30 nm)                               | 62.6% @ 550 nm                         | 2         |
|      | PET       | Ag (6 nm)/ITO (30 nm)                                 | 72.2% @ 550 nm                         |           |
| 2010 | Glass     | AgTi (6 nm)/ZnO (20 nm)                               | 89.5% @ 500 nm                         | 3         |
| 2014 | Glass     | ZrCu (3 nm)/ITO (30 nm)                               | 73% @ 550 nm                           | 4         |
|      | Glass     | AgMgAl (15 nm)/ITO (30 nm)                            | 70% @ 550 nm                           |           |
| 2019 | Glass     | Ag <sub>66</sub> Zr <sub>34</sub> (10 nm)/ITO (30 nm) | 64.0% (T <sub>avg.</sub> :200–1100 nm) | 5         |
| 2019 | Glass     | AZO (200 nm)/Ag (16 nm)                               | < 50% @ 550 nm                         | 6         |
| 2023 | Glass     | AgCr (7 nm)/MGZO (40 nm)                              | 90.1% @ 550 nm                         | This work |
|      | PET       | AgCr (7 nm)/MGZO (40 nm)                              | 90.8% @ 550 nm                         |           |

**Reference**

1. Y.-S. Rim, S.-M. Kim and K.-H. Kim, *Jpn. J. Appl. Phys.*, 2008, **47**, 5022.
2. C. J. Lee, H. K. Lin, S. Y. Sun and J. C. Huang, *Appl. Surf. Sci.*, 2010, **257**, 239–243.
3. K. S. Kao, D. L. Cheng, S. H. Chang, P. T. Hsieh, H. S. Chin and H. K. Lin, *Appl. Surf. Sci.*, 2010, **256**, 7446–7450.
4. H. K. Lin, K. C. Cheng, T. P. Cho and J. C. Huang, *Mater. Sci. Forum*, 2014, **783-786**, 1913–1919.
5. C. M. Chang, H. K. Lin, U.G. Huang, H. A. Hong and J. C. Huang, *Opt. Lasers Eng.*, 2019, **115**, 100–106.
6. A. Bahadoran and N. Zare-Dehnavi, *Mater. Res. Express*, 2019, **6**, 026406.
